# Supplementary material for: CpG sites associated with NRP1, NRXN2 and miR-29b-2 are hypomethylated in monocytes during ageing
Source: PubMed Central journal article supplement (PMC3896835; doi:10.1186/1742-4933-11-1), 2014-01-09
Supplement: 1742-4933-11-1-S1.pdf [file 1742-4933-11-1-S1.pdf]

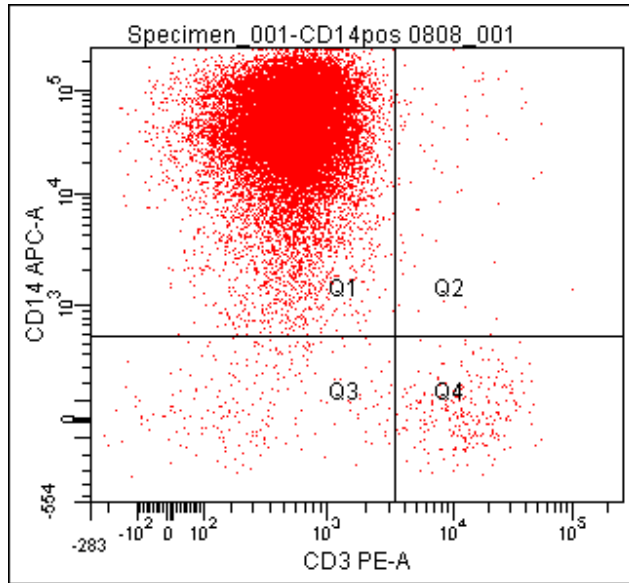

**Additional file 1: Figure S1. The purification of monocyte cell population.** The monocytes were analysed with FACSCalibur (BD Biosciences) using fluorescence conjugated antibodies against CD14 and CD3 (Miltenyi).
